# Supplementary material for: Near-infrared polymer light-emitting diodes based on an inverted device structure
Source: Royal Society of Chemistry journal article supplement (doi:10.1039/c9tc04152d), 2019-01-01
Supplement: c9tc04152d1.pdf [file c9tc04152d1.pdf]

## Supporting information

### Near-infrared polymer light emitting diodes based on an inverted device structure

Jin Xu, <sup>\*a,b</sup> Peng Feng, <sup>b</sup> Zhenzhong Sun, <sup>a</sup> Lei Yu, <sup>\*b,c</sup> Wei Yang, <sup>b</sup> Yong Cao<sup>b</sup>

<sup>a</sup> Neutron Scattering Technical Engineering Research Center, School of Mechanical Engineering, Dongguan University of Technology, Dongguan, 523808, China

<sup>b</sup> Institute of Polymer Optoelectronic Materials and Devices, State Key Laboratory of Luminescent Materials and Devices, South China University of Technology, Guangzhou 510640, China

<sup>c</sup> Guangdong Juhua Printed Display Technology Co., Ltd. Guangzhou 510700, P. R. China

Email: [xujin@dgut.edu.cn](mailto:xujin@dgut.edu.cn)

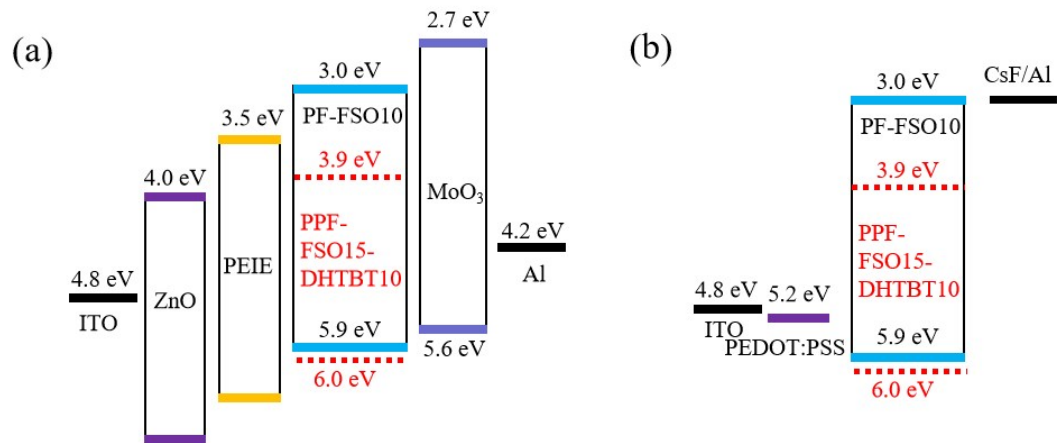

Fig. S1 Energy level diagram of IPLED (a) and CPLED (b).

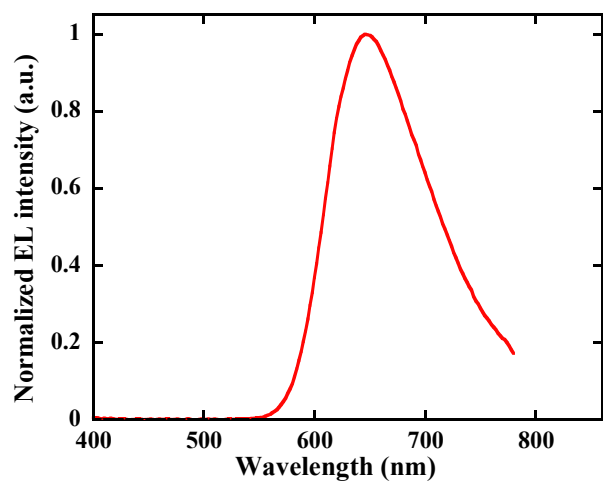

Fig. S2 EL spectrum of PPF-FSO15-DHTBT10 for CPLED device.

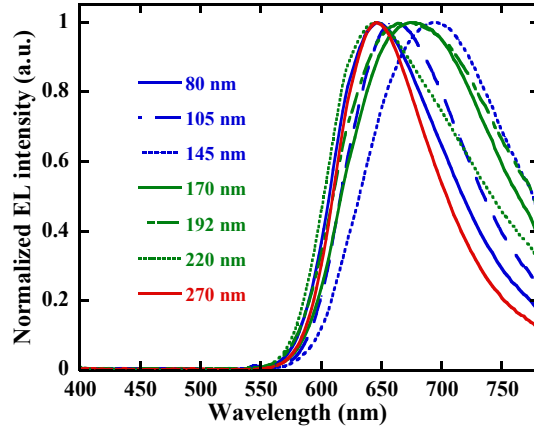

Fig. S3 EL spectra based on different thickness of emissive layer (PPF-FSO15-DHTBT10) for IPLED.

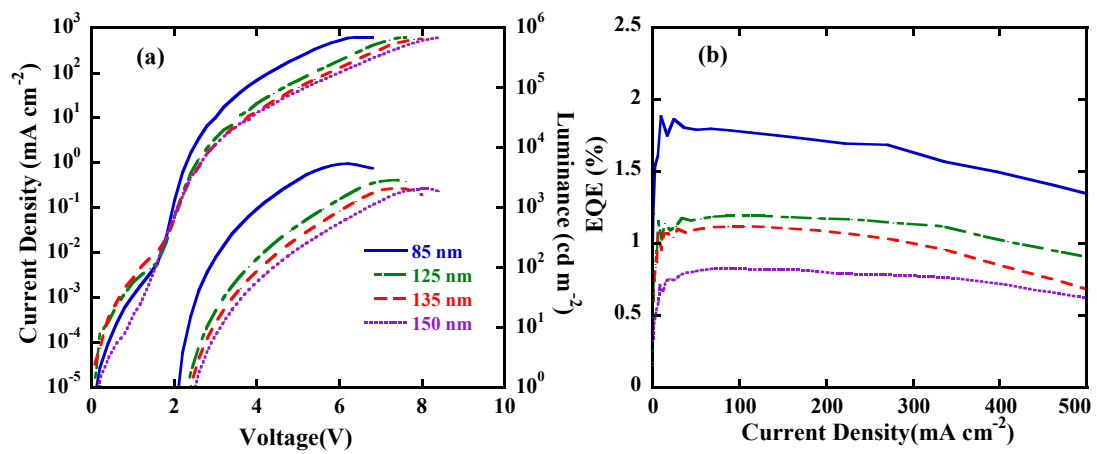

Fig. S4 J-V-L(a) and EQE-J(b) of different thickness of MEH-PPV annealing at 100 °C.

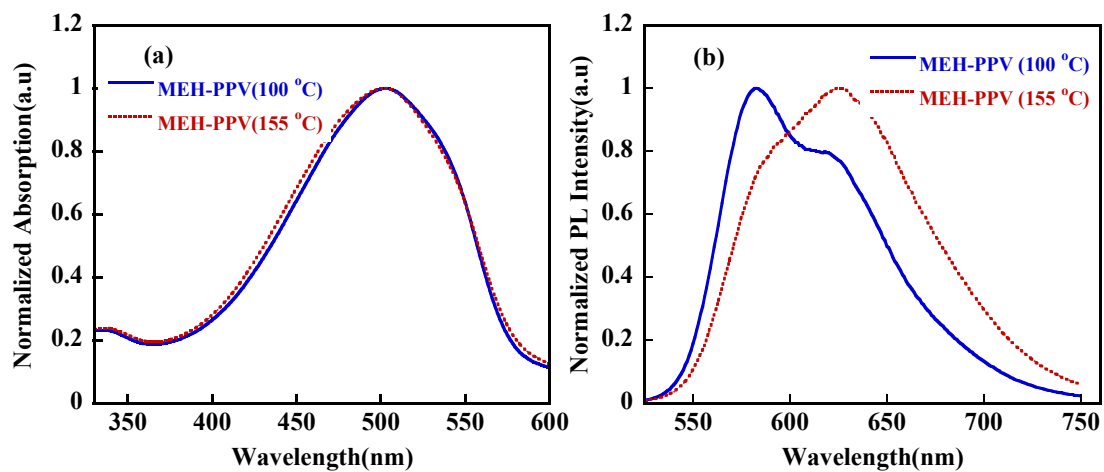

Fig. S5 UV-vis absorption spectra (a) and PL spectra (b) of MEH-PPV film based on different annealing temperature.

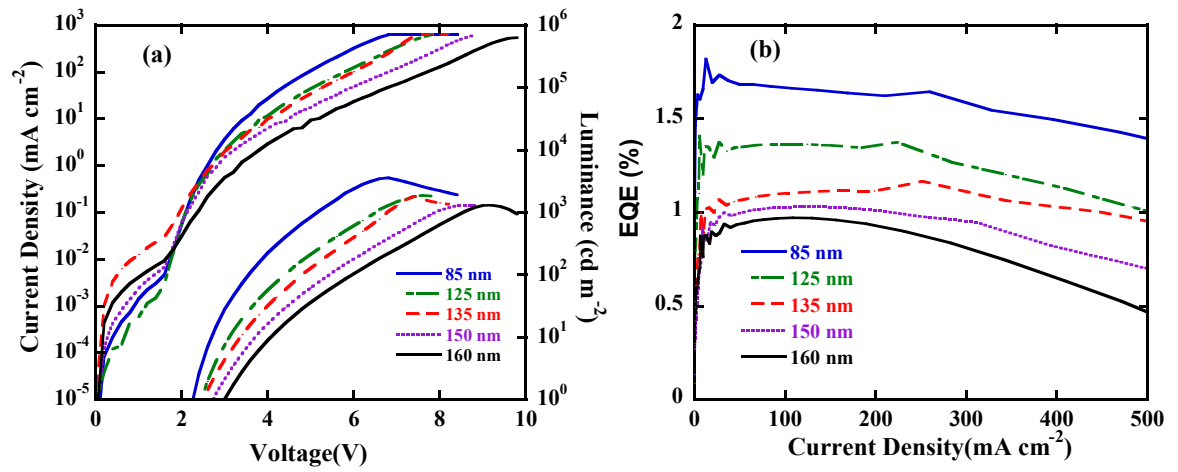

Fig. S6 J-V-L(a) and EQE-J(b) of different thickness of MEH-PPV annealing at 155 °C.
